# Supplementary material
Source: MDPI journal article supplement (https://www.mdpi.com/2813-3323/1/4/15)

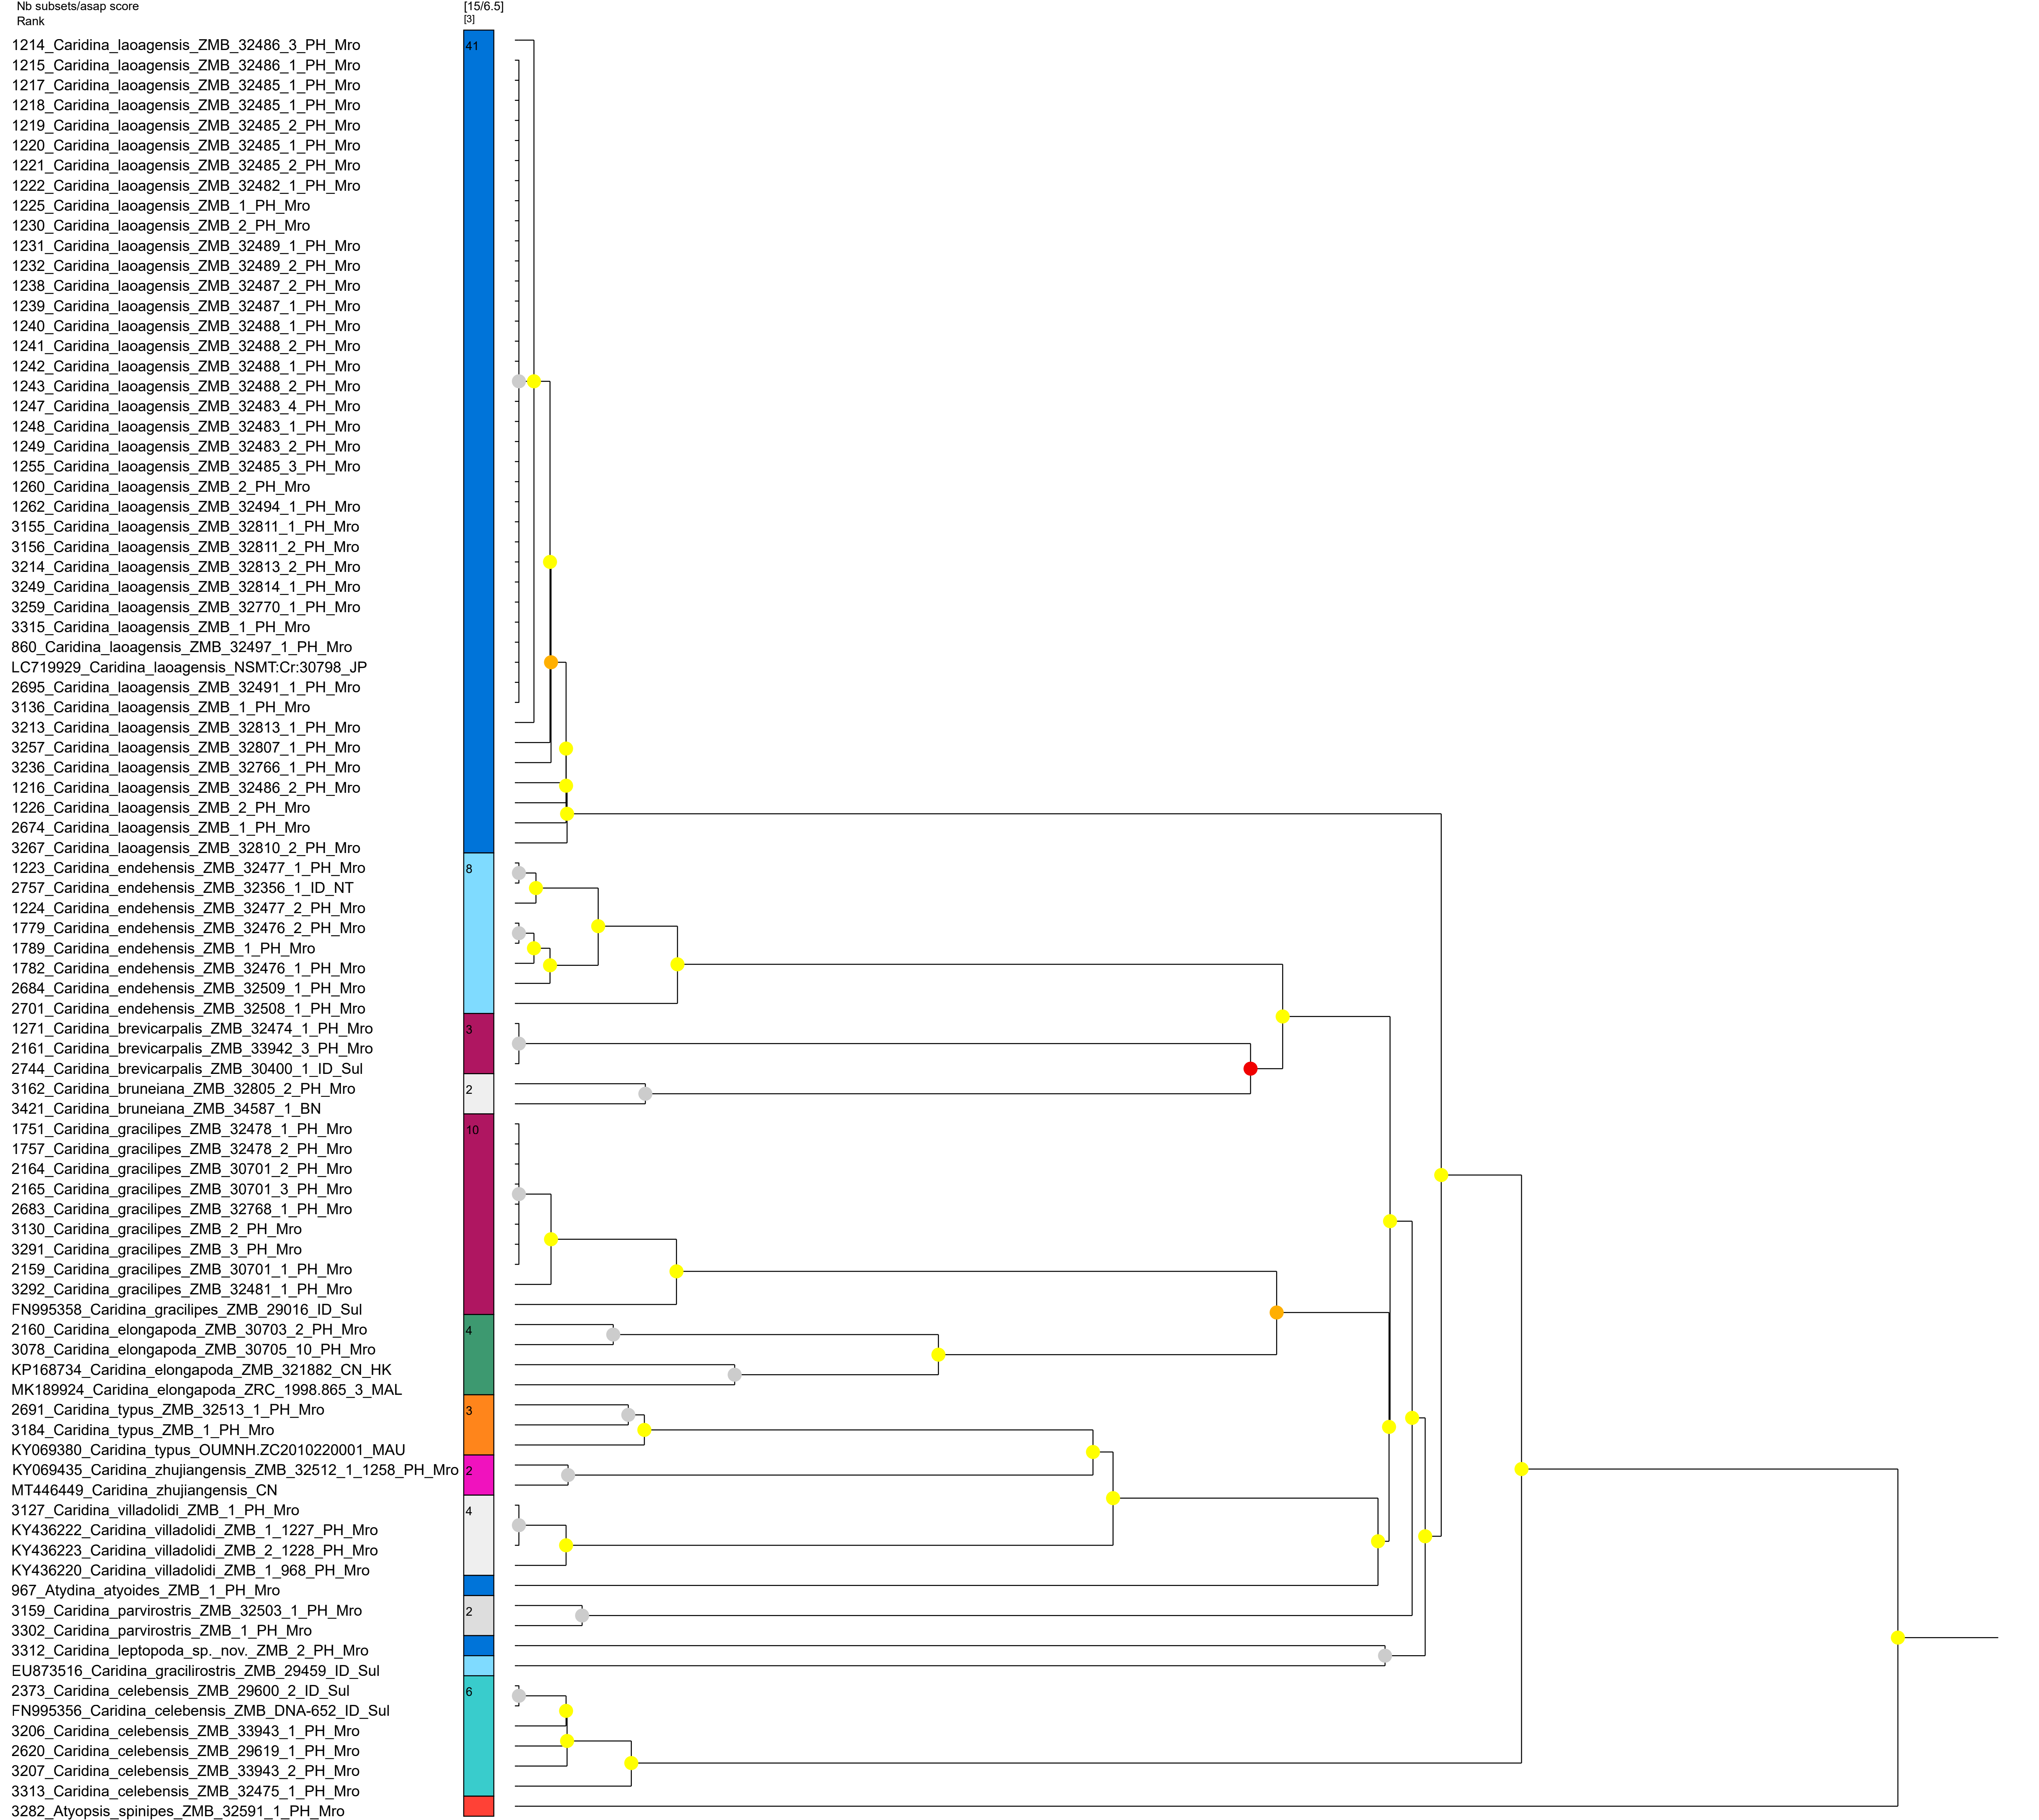

Supplement: s1 [file s1]
